# Supplementary material
Source: PubMed Central journal article supplement (PMC7537107)
Supplement: NIHMS1630164-supplement-All_Supplementary_Material.pdf [file NIHMS1630164-supplement-All_Supplementary_Material.pdf]

**Title: Spinophilin regulates phosphorylation and interactions of the GluN2B subunit of the N-Methyl-D-Aspartate Receptor**

Asma B. Salek<sup>1</sup>, Michael C. Edler.<sup>1,2</sup>, Jonathon P. McBride<sup>1</sup>, Anthony J. Baucum II<sup>1,3,4\*</sup>

<sup>1</sup>Department of Biology, Indiana University-Purdue University, Indianapolis <sup>2</sup>Department of Medical and Molecular Genetics, <sup>3</sup>Stark Neurosciences Research Institute, <sup>4</sup>Department of Pharmacology and Toxicology Indiana University School of Medicine. Indianapolis, IN 46202.

\*To whom correspondence should be sent, laboratory of origin

723 W. Michigan Street

SL306

Indianapolis, IN 46202

[ajbaucum@iupui.edu](mailto:ajbaucum@iupui.edu)

[Phone: \(317\) 274-0540](tel:(317)274-0540)

[Fax: \(317\) 274-2846](tel:(317)274-2846)

Supplementary Figure 1

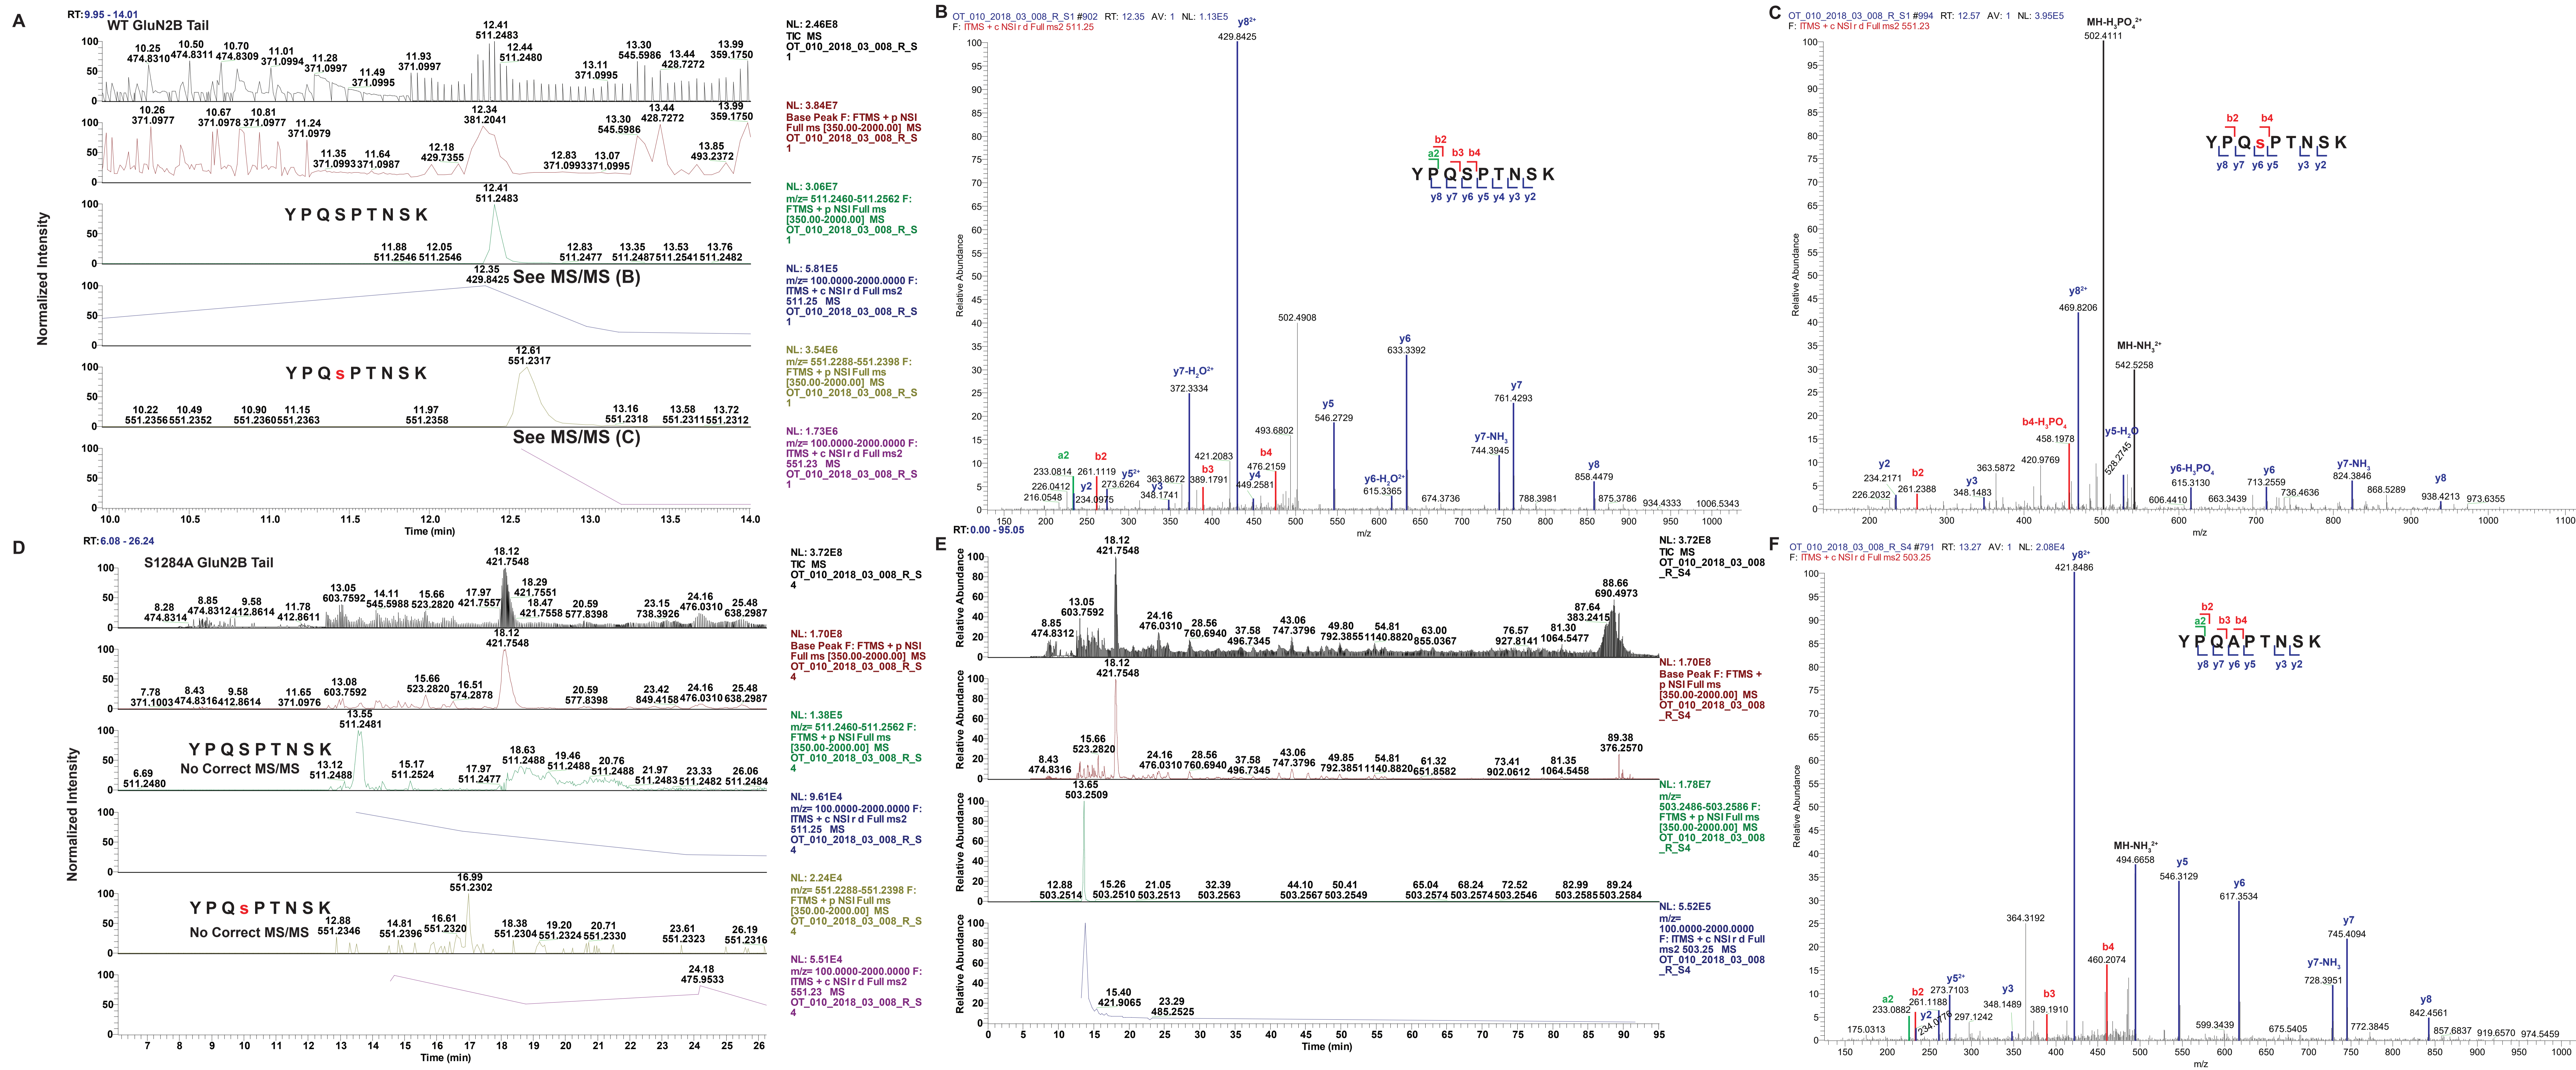

| #  | Visible? | Starred? | Identified Proteins (57)                                                                                                                                                                                                     | Accession No. Alternate ID   | Molecular W | Protein Grou | Taxonomy | P1  | P2  | P3 | P4 | P5  |
|----|----------|----------|------------------------------------------------------------------------------------------------------------------------------------------------------------------------------------------------------------------------------|------------------------------|-------------|--------------|----------|-----|-----|----|----|-----|
| 1  | TRUE     | Empty    | Glutamate receptor ionotropic, NMDA 2B OS=Mus musculus GN=Grln2b PE=1 SV=1                                                                                                                                                   | G3X9V4_MOUSE (+1)            | 166 kDa     | TRUE         | unknown  | 126 | 151 | 74 | 56 | 155 |
| 2  | TRUE     | Empty    | IQ motif and SEC7 domain-containing protein 2 OS=Mus musculus GN=lgsec2 PE=1 SV=1 (E9QAD8_MOUSE)<br>IQ motif and SEC7 domain-containing protein 1 OS=Mus musculus GN=lgsec1 PE=1 SV=1                                        | E9QAD8_MOUSE [3]             | 163 kDa     | TRUE         | unknown  | 87  | 108 | 55 | 29 | 147 |
| 3  | TRUE     | Empty    | SH3 and multiple ankyrin repeat domains protein 2 OS=Mus musculus GN=Shank2 PE=1 SV=2 (SHAN2_MOUSE)                                                                                                                          | SHAN2_MOUSE [3]              | 159 kDa     | TRUE         | unknown  | 12  | 15  | 6  | 2  | 19  |
| 4  | TRUE     | Empty    | SH3 and multiple ankyrin repeat domains protein 3 OS=Mus musculus GN=Shank3 PE=1 SV=1 (A0A0A0MQD5_MOUSE)                                                                                                                     | A0A0A0MQD5_MOUSE [2]         | 192 kDa     | TRUE         | unknown  | 78  | 96  | 53 | 34 | 124 |
| 5  | TRUE     | Empty    | Glutamate receptor ionotropic, NMDA 2A OS=Mus musculus GN=Grln2a PE=1 SV=2                                                                                                                                                   | NMDE1_MOUSE                  | 165 kDa     | TRUE         | unknown  | 36  | 44  | 24 | 12 | 54  |
| 10 | TRUE     | Empty    | Leucine-rich repeat-containing protein 7 OS=Mus musculus GN=Lr7c7 PE=1 SV=1                                                                                                                                                  | A0A0G2JDT9_MOUSE (+3)        | 168 kDa     | TRUE         | unknown  | 35  | 54  | 23 | 13 | 49  |
| 11 | TRUE     | Empty    | Calcium/calmodulin-dependent protein kinase type II subunit alpha OS=Mus musculus GN=Camk2a PE=1 SV=2 (KCC2A_MOUSE)<br>Calcium/calmodulin-dependent protein kinase type II subunit delta OS=Mus musculus GN=Camk2d PE=1 SV=1 | KCC2A_MOUSE [8]              | 54 kDa      | TRUE         | unknown  | 11  | 10  | 3  | 3  | 19  |
| 12 | TRUE     | Empty    | Ras/Rap GTPase-activating protein SynGAP OS=Mus musculus GN=Syngap1 PE=1 SV=1 (J3QQ18_MOUSE)                                                                                                                                 | J3QQ18_MOUSE [5]             | 145 kDa     | TRUE         | unknown  | 13  | 19  | 8  | 6  | 24  |
| 13 | TRUE     | Empty    | SH3 and multiple ankyrin repeat domains protein 1 OS=Mus musculus GN=Shank1 PE=1 SV=1                                                                                                                                        | D3YZU4_MOUSE (+2)            | 225 kDa     | TRUE         | unknown  | 3   | 6   | 2  | 1  | 6   |
| 14 | TRUE     | Empty    | Unconventional myosin-Va OS=Mus musculus GN=Myo5a PE=1 SV=1 (D3YZ62_MOUSE)                                                                                                                                                   | D3YZ62_MOUSE [4]             | 212 kDa     | TRUE         | unknown  | 10  | 12  | 5  | 2  | 18  |
| 17 | TRUE     | Empty    | Calcium/calmodulin-dependent protein kinase type II subunit beta OS=Mus musculus GN=Camk2b PE=1 SV=1 (QSSVI3_MOUSE)<br>Calcium/calmodulin-dependent protein kinase type II subunit gamma OS=Mus musculus GN=Camk2g PE=1 SV=1 | QSSVI3_MOUSE [3]             | 58 kDa      | TRUE         | unknown  | 9   | 10  | 7  | 2  | 16  |
| 18 | TRUE     | Empty    | Homerin OS=Homo sapiens GN=HRNR PE=1 SV=2                                                                                                                                                                                    | sp Q86YZ3 HORN_HUMA ?        |             | unknown      |          | 13  | 10  | 0  | 0  | 10  |
| 20 | TRUE     | Empty    | Actin, cytoplasmic 1 OS=Homo sapiens GN=ACTB PE=1 SV=1                                                                                                                                                                       | sp P60709 ACTB_HUMAN ?       |             | unknown      |          | 3   | 6   | 2  | 2  | 11  |
| 21 | TRUE     | Empty    | Alpha-S2-casein CONTAMINANT OS=Bos taurus GN=CSN1S2 PE=1 SV=2                                                                                                                                                                | CASA2_BOVIN                  | 26 kDa      | unknown      |          | 2   | 2   | 1  | 1  | 5   |
| 22 | TRUE     | Empty    | Myelin basic protein (Fragment) OS=Mus musculus GN=Mbp PE=1 SV=1                                                                                                                                                             | F6RT34_MOUSE (+1)            | 23 kDa      | unknown      |          | 3   | 4   | 2  | 2  | 1   |
| 23 | TRUE     | Empty    | Kappa-casein CONTAMINANT OS=Bos taurus GN=CSN3 PE=1 SV=1                                                                                                                                                                     | CASK_BOVIN                   | 21 kDa      | unknown      |          | 2   | 1   | 1  | 0  | 2   |
| 24 | TRUE     | Empty    | Disks large-associated protein 1 OS=Mus musculus GN=Dlgap1 PE=1 SV=3                                                                                                                                                         | DLGP1_MOUSE                  | 110 kDa     | TRUE         | unknown  | 2   | 1   | 0  | 0  | 1   |
| 25 | TRUE     | Empty    | Disks large-associated protein 4 OS=Mus musculus GN=Dlgap4 PE=1 SV=1                                                                                                                                                         | B7ZNS2_MOUSE (+1)            | 106 kDa     | TRUE         | unknown  | 1   | 1   | 2  | 0  | 2   |
| 26 | TRUE     | Empty    | Disks large-associated protein 2 OS=Mus musculus GN=Dlgap2 PE=1 SV=2                                                                                                                                                         | DLGP2_MOUSE (+1)             | 119 kDa     | TRUE         | unknown  | 2   | 3   | 0  | 0  | 4   |
| 27 | TRUE     | Empty    | Laminin subunit beta-2 OS=Mus musculus GN=Lamb2 PE=1 SV=2                                                                                                                                                                    | LAMB2_MOUSE                  | 197 kDa     | TRUE         | unknown  | 1   | 3   | 1  | 0  | 2   |
| 28 | TRUE     | Empty    | Citron Rho-interacting kinase OS=Mus musculus GN=Cit PE=1 SV=3                                                                                                                                                               | CTRO_MOUSE (+5)              | 235 kDa     | unknown      |          | 2   | 2   |    | 0  | 1   |
| 29 | TRUE     | Empty    | Disks large homolog 4 OS=Mus musculus GN=Dlg4 PE=1 SV=1                                                                                                                                                                      | DLG4_MOUSE (+1)              | 80 kDa      | unknown      |          | 1   | 2   | 1  | 0  | 1   |
| 30 | TRUE     | Empty    | Kalirin OS=Mus musculus GN=Kalrn PE=1 SV=1                                                                                                                                                                                   | A0A0A0MQF1_MOUSE (+ 219 kDa) |             | unknown      |          | 1   | 1   |    | 0  | 2   |
| 31 | TRUE     | Empty    | Cluster of Neurofilament heavy polypeptide OS=Homo sapiens GN=NEFH PE=1 SV=4 (sp P12036 NFH_HUMAN)                                                                                                                           | sp P12036 NFH_HUMAN ?        |             | unknown      |          | 1   | 1   |    | 0  | 3   |
| 32 | TRUE     | Empty    | Cluster of Sodium/potassium-transporting ATPase subunit alpha OS=Mus musculus GN=Atp1a3 PE=1 SV=1 (A0A0G2JGX4_MOUSE)                                                                                                         | A0A0G2JGX4_MOUSE [9]         | 113 kDa     | TRUE         | unknown  | 0   |     |    |    | 3   |
| 33 | TRUE     | Empty    | Tubulin alpha-1C chain OS=Mus musculus GN=Tuba1c PE=1 SV=1                                                                                                                                                                   | TBA1_MOUSE (+3)              | 50 kDa      | unknown      |          |     |     |    |    | 4   |
| 34 | TRUE     | Empty    | Reticulon-4 OS=Mus musculus GN=Rtn4 PE=1 SV=2                                                                                                                                                                                | RTN4_MOUSE                   | 127 kDa     | unknown      |          |     |     |    |    | 2   |
| 35 | TRUE     | Empty    | KCC2a-S25 variant 1 OS=Mus musculus GN=Slc12a5 PE=1 SV=1                                                                                                                                                                     | A0A076FR46_MOUSE (+1)        | 126 kDa     | unknown      |          |     |     |    |    | 2   |

| Name                                                                                                                            |                             |         |      | WT      | KO  | WT  | KO | WT  | KO  | WT | KO |
|---------------------------------------------------------------------------------------------------------------------------------|-----------------------------|---------|------|---------|-----|-----|----|-----|-----|----|----|
| Actin, cytoplasmic 1 (Fragment) OS=Mus musculus GN=Actb PE=1 SV=1                                                               |                             |         |      |         | 10  | 7   | 2  | 4   | 5   | 4  | 4  |
| Actin, cytoplasmic 2 OS=Mus musculus GN=Actg1 PE=1 SV=1 (ACTG_MOUSE)                                                            | ACTG_MOUSE [2]              | 42 kDa  | TRUE | unknown | 14  | 6   | 1  | 2   | 7   | 3  | 3  |
| ADP/ATP translocase 1 OS=Mus musculus GN=Slc25a4 PE=1 SV=4                                                                      | ADT1_MOUSE                  | 33 kDa  |      | unknown | 4   | 1   | 1  |     |     |    |    |
| Ankyrin repeat and sterile alpha motif domain-containing protein 1B OS=Mus musculus GN=Anks1b PE=1 SV=1                         | A0A0R4J2A6_MOUSE (+6)       | 48 kDa  |      | unknown | 3   | 6   | 7  | 1   | 3   |    |    |
| Brain-enriched guanylate kinase-associated protein OS=Mus musculus GN=Begain PE=1 SV=1                                          | A0A1B0GT88_MOUSE (+2)       | 89 kDa  |      | unknown | 4   | 2   | 5  | 3   |     |    |    |
| Brain-specific angiogenesis inhibitor 1-associated protein 2 OS=Mus musculus GN=Baiap2 PE=1 SV=1                                | B1AZ46_MOUSE (+1)           | 58 kDa  |      | unknown | 45  | 25  | 26 | 31  | 19  | 5  |    |
| Calcium/calmodulin-dependent protein kinase type II subunit alpha OS=Mus musculus GN=Camk2a PE=1 SV=2 (KCC2_KCC2A_MOUSE [5])    |                             | 54 kDa  | TRUE | unknown | 49  | 54  | 38 | 48  | 43  | 41 | 41 |
| Calcium/calmodulin-dependent protein kinase type II subunit beta OS=Mus musculus GN=Camk2b PE=1 SV=2                            |                             |         |      |         | 28  | 26  | 16 | 29  | 19  | 20 |    |
| Calcium/calmodulin-dependent protein kinase type II subunit delta OS=Mus musculus GN=Camk2d PE=1 SV=1                           |                             |         |      |         | 21  | 23  | 25 | 18  | 13  | 15 | 15 |
| Calcium/calmodulin-dependent protein kinase type II subunit gamma OS=Mus musculus GN=Camk2g PE=1 SV=1 (K0_KCC2G_MOUSE [4])      |                             | 60 kDa  | TRUE | unknown | 16  | 19  | 13 | 15  | 12  | 13 | 13 |
| Citron Rho-interacting kinase OS=Mus musculus GN=Cit PE=1 SV=3                                                                  | CTRO_MOUSE (+5)             | 235 kDa |      | unknown |     | 2   |    | 0   | 2   |    |    |
| Cluster of Neurofilament heavy polypeptide OS=Homo sapiens GN=NEFH PE=1 SV=4 (sp P12036 NFH_HUMAN)                              | sp P12036 NFH_HUMAN ?       |         | TRUE | unknown |     | 1   |    | 0   | 3   |    |    |
| Cluster of Sodium/potassium-transporting ATPase subunit alpha OS=Mus musculus GN=Atp1a3 PE=1 SV=1 (A0A0G2.A0A0G2JGX4_MOUSE [9]) |                             | 113 kDa | TRUE | unknown |     | 0   |    |     | 4   |    |    |
| Disks large homolog 4 OS=Mus musculus GN=Dlg4 PE=1 SV=1 (DLG4_MOUSE)                                                            | DLG4_MOUSE [6]              | 80 kDa  | TRUE | unknown | 98  | 60  | 68 | 102 | 42  | 44 | 44 |
| Disks large homolog 2 OS=Mus musculus GN=Dlg2 PE=1 SV=2                                                                         |                             |         |      |         | 35  | 18  | 25 | 42  | 15  | 18 | 18 |
| Disks large-associated protein 1 OS=Mus musculus GN=Dlgap1 PE=1 SV=3 (DLGP1_MOUSE)                                              | DLGP1_MOUSE [2]             | 110 kDa | TRUE | unknown | 11  | 12  | 18 | 3   | 2   | 2  | 2  |
| Disks large-associated protein 2 OS=Mus musculus GN=Dlgap2 PE=1 SV=2                                                            | DLGP2_MOUSE (+1)            | 119 kDa | TRUE | unknown | 12  | 10  | 6  | 1   | 2   |    |    |
| Disks large-associated protein 3 OS=Mus musculus GN=Dlgap3 PE=1 SV=1                                                            | B1AS06_MOUSE (+1)           | 105 kDa |      | unknown | 12  | 11  | 3  | 20  | 6   | 5  | 5  |
| Disks large-associated protein 4 OS=Mus musculus GN=Dlgap4 PE=1 SV=1                                                            | B7ZNS2_MOUSE (+1)           | 106 kDa | TRUE | unknown | 15  | 8   | 8  | 2   | 4   |    |    |
| Glutamate receptor ionotropic, NMDA 1 OS=Mus musculus GN=Grin1 PE=1 SV=1                                                        | A2AI21_MOUSE (+1)           | 108 kDa |      | unknown | 8   | 22  | 27 | 7   | 2   | 6  | 6  |
| Glutamate receptor ionotropic, NMDA 2A OS=Mus musculus GN=Grin2a PE=1 SV=2                                                      | NMDE1_MOUSE                 | 165 kDa | TRUE | unknown | 35  | 54  | 23 | 13  | 49  | 8  | 8  |
| Glutamate receptor ionotropic, NMDA 2B OS=Mus musculus GN=Grin2b PE=1 SV=1                                                      | G3X9V4_MOUSE (+1)           | 166 kDa | TRUE | unknown | 133 | 160 | 76 | 65  | 161 | 49 | 49 |
| Homer protein homolog 1 OS=Mus musculus GN=Homer1 PE=1 SV=2                                                                     | HOME1_MOUSE                 | 41 kDa  | TRUE | unknown | 26  | 17  | 20 | 26  | 13  | 12 | 12 |
| Hornerin OS=Homo sapiens GN=HRNR PE=1 SV=2                                                                                      | sp Q86YZ3 HORN_HUMA ?       |         |      | unknown | 9   | 2   | 0  | 3   | 4   | 3  | 3  |
| IQ motif and SEC7 domain-containing protein 1 OS=Mus musculus GN=Iqsec1 PE=1 SV=1                                               |                             |         |      |         | 22  | 21  | 9  | 9   | 19  | 3  | 3  |
| IQ motif and SEC7 domain-containing protein 2 OS=Mus musculus GN=Iqsec2 PE=1 SV=3                                               | IQEC2_MOUSE                 | 162 kDa | TRUE | unknown | 118 | 116 | 68 | 53  | 149 | 30 | 30 |
| Kalirin OS=Mus musculus GN=Kalrn PE=1 SV=1                                                                                      | A0A0A0MQF1_MOUSE (+219 kDa) |         |      | unknown | 1   | 1   |    | 0   | 2   |    |    |
| Kappa-casein CONTAMINANT OS=Bos taurus GN=CSN3 PE=1 SV=1                                                                        | CASK_BOVIN                  | 21 kDa  |      | unknown | 2   | 1   | 0  | 0   | 1   | 0  | 0  |
| KCC2a-S25 variant 1 OS=Mus musculus GN=Slc12a5 PE=1 SV=1                                                                        | A0A076FR46_MOUSE (+1)       | 126 kDa |      | unknown |     |     |    |     | 2   |    |    |
| Laminin subunit beta-2 OS=Mus musculus GN=Lamb2 PE=1 SV=2                                                                       | LAMB2_MOUSE                 | 197 kDa | TRUE | unknown |     | 2   |    | 0   | 1   | 0  | 0  |
| Leucine-rich repeat-containing protein 7 OS=Mus musculus GN=Lrrc7 PE=1 SV=1                                                     | A0A0G2JDT9_MOUSE (+3)       | 168 kDa | TRUE | unknown | 11  | 10  | 3  | 3   | 19  | 2  | 2  |
| Myelin basic protein (Fragment) OS=Mus musculus GN=Mbp PE=1 SV=1 (F6RWW8_MOUSE)                                                 | F6RWW8_MOUSE [2]            | 16 kDa  | TRUE | unknown | 13  | 7   | 3  | 6   | 2   | 1  | 1  |
| Protein Rasal2 OS=Mus musculus GN=Rasal2 PE=1 SV=1                                                                              |                             |         |      |         | 7   |     | 5  | 6   | 4   | 2  | 2  |
| Ras/Rap GTPase-activating protein SynGAP OS=Mus musculus GN=Syngap1 PE=1 SV=2 (SYGP1_MOUSE)                                     | SYGP1_MOUSE [5]             | 148 kDa | TRUE | unknown | 88  | 59  | 55 | 72  | 50  | 36 | 36 |
| Reticulon-4 OS=Mus musculus GN=Rtn4 PE=1 SV=2                                                                                   | RTN4_MOUSE                  | 127 kDa |      | unknown |     |     |    |     | 2   |    |    |
| SH3 and multiple ankyrin repeat domains protein 1 OS=Mus musculus GN=Shank1 PE=1 SV=1 (D3YZU4_MOUSE)                            | D3YZU4_MOUSE [3]            | 225 kDa | TRUE | unknown | 79  | 36  | 48 | 61  | 43  | 22 | 22 |
| SH3 and multiple ankyrin repeat domains protein 2 OS=Mus musculus GN=Shank2 PE=1 SV=2 (SHAN2_MOUSE)                             | SHAN2_MOUSE [3]             | 159 kDa | TRUE | unknown | 82  | 99  | 60 | 37  | 124 | 21 | 21 |
| SH3 and multiple ankyrin repeat domains protein 3 OS=Mus musculus GN=Shank3 PE=1 SV=1 (A0A0A0MQD5_MOUSE A0A0A0MQD5_MOUSE [2])   |                             | 192 kDa | TRUE | unknown | 77  | 62  | 39 | 55  | 67  | 20 | 20 |
| Tubulin alpha chain (Fragment) OS=Mus musculus GN=Tuba4a PE=1 SV=1                                                              |                             |         |      |         | 5   |     |    | 2   | 1   |    | 1  |
| Tubulin alpha-1A chain OS=Mus musculus GN=Tuba1a PE=1 SV=1 (TBA1A_MOUSE)                                                        | TBA1A_MOUSE [5]             | 50 kDa  | TRUE | unknown | 7   | 4   | 4  | 4   |     | 3  | 3  |
| Tubulin alpha-1C chain OS=Mus musculus GN=Tuba1c PE=1 SV=1                                                                      | TBA1C_MOUSE (+3)            | 50 kDa  |      | unknown |     |     |    |     | 3   |    |    |
| Unconventional myosin-Va OS=Mus musculus GN=Myo5a PE=1 SV=1 (D3YZ62_MOUSE)                                                      | D3YZ62_MOUSE [4]            | 212 kDa | TRUE | unknown | 13  | 10  | 0  | 0   | 10  | 1  | 1  |

| #  | Visible? | Starred? | Identified Proteins (66)                                                                                            | Accession No          | Alternate ID | Molecular W | Protein Grou | Taxonomy | S1 | S2 | S3 | S4  | S5 | S6 |
|----|----------|----------|---------------------------------------------------------------------------------------------------------------------|-----------------------|--------------|-------------|--------------|----------|----|----|----|-----|----|----|
| 2  | TRUE     | Empty    | Disks large homolog 4 OS=Mus musculus GN=Dlg4 PE=1 SV=1 (DLG4_MOUSE)                                                | DLG4_MOUSE [6]        | 80 kDa       | TRUE        | unknown      |          | 97 | 58 | 67 | 102 | 41 | 44 |
|    |          |          | Disks large homolog 2 OS=Mus musculus GN=Dlg2 PE=1 SV=2                                                             |                       |              |             |              |          | 35 | 18 | 25 | 42  | 15 | 18 |
| 3  | TRUE     | Empty    | Ras/Rap GTPase-activating protein SynGAP OS=Mus musculus GN=Syngap1 PE=1 SV=2 (SYGP1_MOUSE)                         | SYGP1_MOUSE [5]       | 148 kDa      | TRUE        | unknown      |          | 78 | 47 | 50 | 70  | 32 | 33 |
|    |          |          | Protein Rasal2 OS=Mus musculus GN=Rasal2 PE=1 SV=1                                                                  |                       |              |             |              |          | 7  |    | 5  | 6   | 4  | 2  |
| 4  | TRUE     | Empty    | SH3 and multiple ankyrin repeat domains protein 1 OS=Mus musculus GN=Shank1 PE=1 SV=1 (D3YZU4_MOUSE)                | D3YZU4_MOUSE [3]      | 225 kDa      | TRUE        | unknown      |          | 70 | 26 | 41 | 59  | 27 | 20 |
| 7  | TRUE     | Empty    | Brain-specific angiogenesis inhibitor 1-associated protein 2 OS=Mus musculus GN=Baiap2 PE=1 SV=1                    | B1AZ46_MOUSE (+1)     | 58 kDa       |             | unknown      |          | 45 | 25 | 26 | 31  | 19 | 5  |
| 8  | TRUE     | Empty    | Calcium/calmodulin-dependent protein kinase type II subunit alpha OS=Mus musculus GN=Camk2a PE=1 SV=2 (KCC2A_MOUSE) | KCC2A_MOUSE [5]       | 54 kDa       | TRUE        | unknown      |          | 36 | 35 | 30 | 42  | 19 | 33 |
|    |          |          | Calcium/calmodulin-dependent protein kinase type II subunit delta OS=Mus musculus GN=Camk2d PE=1 SV=1               |                       |              |             |              |          | 18 | 17 | 13 | 17  | 7  | 14 |
| 9  | TRUE     | Empty    | SH3 and multiple ankyrin repeat domains protein 3 OS=Mus musculus GN=Shank3 PE=1 SV=1                               | A0A0A0MQ05_MOUSE      | 192 kDa      | TRUE        | unknown      |          | 41 | 18 | 15 | 43  | 13 | 10 |
| 11 | TRUE     | Empty    | Homer protein homolog 1 OS=Mus musculus GN=Homer1 PE=1 SV=2                                                         | HOME1_MOUSE           | 41 kDa       | TRUE        | unknown      |          | 26 | 17 | 20 | 26  | 13 | 12 |
| 13 | TRUE     | Empty    | Glutamate receptor ionotropic, NMDA 1 OS=Mus musculus GN=Grin1 PE=1 SV=1                                            | A2AI21_MOUSE (+1)     | 108 kDa      |             | unknown      |          | 8  | 22 | 27 | 7   | 2  | 6  |
| 14 | TRUE     | Empty    | Calcium/calmodulin-dependent protein kinase type II subunit gamma OS=Mus musculus GN=Camk2g PE=1 SV=1 (KCC2G_MOUSE) | KCC2G_MOUSE [4]       | 60 kDa       | TRUE        | unknown      |          | 14 | 17 | 12 | 14  | 7  | 13 |
|    |          |          | Calcium/calmodulin-dependent protein kinase type II subunit beta OS=Mus musculus GN=Camk2b PE=1 SV=2                |                       |              |             |              |          | 25 | 20 | 14 | 27  | 8  | 17 |
| 15 | TRUE     | Empty    | IQ motif and SEC7 domain-containing protein 2 OS=Mus musculus GN=Iqsec2 PE=1 SV=3                                   | IQEC2_MOUSE           | 162 kDa      | TRUE        | unknown      |          | 31 | 8  | 13 | 24  | 2  |    |
| 16 | TRUE     | Empty    | Disks large-associated protein 3 OS=Mus musculus GN=Dlgap3 PE=1 SV=1                                                | B1AS06_MOUSE (+1)     | 105 kDa      |             | unknown      |          | 12 | 11 | 3  | 20  | 6  | 5  |
| 19 | TRUE     | Empty    | Disks large-associated protein 1 OS=Mus musculus GN=Dlgap1 PE=1 SV=3 (DLGP1_MOUSE)                                  | DLGP1_MOUSE [2]       | 110 kDa      | TRUE        | unknown      |          | 10 | 11 | 16 | 3   |    | 2  |
| 20 | TRUE     | Empty    | Glutamate receptor ionotropic, NMDA 2B OS=Mus musculus GN=Grin2b PE=1 SV=1 (G3X9V4_MOUSE)                           | G3X9V4_MOUSE [3]      | 166 kDa      | TRUE        | unknown      |          | 7  | 9  | 2  | 9   | 6  | 1  |
| 21 | TRUE     | Empty    | Actin, cytoplasmic 2 OS=Mus musculus GN=Actg1 PE=1 SV=1 (ACTG_MOUSE)                                                | ACTG_MOUSE [2]        | 42 kDa       | TRUE        | unknown      |          | 14 | 6  | 1  | 2   | 7  | 3  |
|    |          |          | Actin, cytoplasmic 1 (Fragment) OS=Mus musculus GN=Actb PE=1 SV=1                                                   |                       |              |             |              |          | 7  | 3  |    | 2   | 4  | 3  |
| 22 | TRUE     | Empty    | Myelin basic protein (Fragment) OS=Mus musculus GN=Mbp PE=1 SV=1 (F6RWW8_MOUSE)                                     | F6RWW8_MOUSE [2]      | 16 kDa       | TRUE        | unknown      |          | 11 | 6  | 3  | 6   |    | 1  |
| 23 | TRUE     | Empty    | Tubulin alpha-1A chain OS=Mus musculus GN=Tuba1a PE=1 SV=1 (TBA1A_MOUSE)                                            | TBA1A_MOUSE [5]       | 50 kDa       | TRUE        | unknown      |          | 7  | 4  | 4  | 4   |    | 3  |
|    |          |          | Tubulin alpha chain (Fragment) OS=Mus musculus GN=Tuba4a PE=1 SV=1                                                  |                       |              |             |              |          | 5  |    |    | 2   |    | 1  |
| 24 | TRUE     | Empty    | Ankyrin repeat and sterile alpha motif domain-containing protein 1B OS=Mus musculus GN=Anks1b PE=1 SV=1             | A0A0R4J2A6_MOUSE (+6) | 48 kDa       |             | unknown      |          | 3  | 6  | 7  | 1   |    | 3  |
| 26 | TRUE     | Empty    | Brain-enriched guanylate kinase-associated protein OS=Mus musculus GN=Begain PE=1 SV=1                              | A0A1B0GT88_MOUSE (+2) | 89 kDa       |             | unknown      |          | 4  | 2  | 5  | 3   |    |    |
| 27 | TRUE     | Empty    | IQ motif and SEC7 domain-containing protein 1 OS=Mus musculus GN=Iqsec1 PE=1 SV=1                                   | E9PUA3_MOUSE          | 123 kDa      | TRUE        | unknown      |          | 10 | 6  | 3  | 7   |    |    |
| 28 | TRUE     | Empty    | Disks large-associated protein 4 OS=Mus musculus GN=Dlgap4 PE=1 SV=1                                                | B7ZNS2_MOUSE (+1)     | 106 kDa      | TRUE        | unknown      |          | 13 | 5  | 8  | 2   |    |    |
| 29 | TRUE     | Empty    | SH3 and multiple ankyrin repeat domains protein 2 OS=Mus musculus GN=Shank2 PE=1 SV=1                               | D3Z5K8_MOUSE          | 200 kDa      | TRUE        | unknown      |          | 4  | 3  | 7  | 3   |    |    |
| 30 | TRUE     | Empty    | ADP/ATP translocase 1 OS=Mus musculus GN=Slc25a4 PE=1 SV=4                                                          | ADT1_MOUSE            | 33 kDa       |             | unknown      |          | 4  | 1  | 1  |     |    |    |
| 31 | TRUE     | Empty    | Disks large-associated protein 2 OS=Mus musculus GN=Dlgap2 PE=1 SV=2                                                | DLGP2_MOUSE (+1)      | 119 kDa      | TRUE        | unknown      |          | 11 | 7  | 5  | 1   |    |    |

| At least 6 spectral counts                                                                                          | Gene name WT |     | KO  |    | WT  |     | KO |    | Total Spectra | CRAPOME average spectral counts | Total WT | Total KO | Normalized |            |            |             | Total WT   | Total KO   | Ratio KO/WTLog transform |             |            |            |            |       |       |
|---------------------------------------------------------------------------------------------------------------------|--------------|-----|-----|----|-----|-----|----|----|---------------|---------------------------------|----------|----------|------------|------------|------------|-------------|------------|------------|--------------------------|-------------|------------|------------|------------|-------|-------|
|                                                                                                                     | WT           | KO  | WT  | KO | WT  | KO  | WT | KO |               |                                 |          |          | WT         | KO         | WT         | KO          |            |            |                          | WT          | KO         |            |            |       |       |
| ADP/ATP translocase 1 OS=Mus musculus GN=Slg25a4 PE=1 SV=4                                                          | Slg25a4      | 4   | 1   | 1  |     |     |    |    | 6             | 5.1                             | 5        | 1        | 0.20       | -0.2129261 | 0.0300752  | 0.00625     | 0.0121579  | 0          | 0                        | 0.04262331  | 0.00625    | 0.14       | -2.98      |       |       |
| Disks large-associated protein 4 OS=Mus musculus GN=Dlgap4 PE=1 SV=1                                                | Dlgap4       | 15  | 8   | 8  | 2   | 4   |    |    | 37            | 1                               | 27       | 10       | 0.37       | -1.4329594 | 0.11278195 | 0.05        | 0.10526316 | 0.03076923 | 0.02484472               | 0           | 0.24289883 | 0.08076923 | 0.33       | -1.59 |       |
| Ankyrin repeat and sterile alpha motif domain-containing protein 18 OS=Mus musculus GN=Anks1b PE=1 SV=1             | Anks1b       | 3   | 6   | 7  | 1   | 3   |    |    | 20            | 0                               | 13       | 7        | 0.54       | -0.8930848 | 0.02255639 | 0.0375      | 0.09210526 | 0.01538462 | 0.01863354               | 0           | 0.13329518 | 0.05288462 | 0.40       | -1.33 |       |
| Disks large-associated protein 2 OS=Mus musculus GN=Dlgap2 PE=1 SV=2                                                | Dlgap2       | 12  | 10  | 6  | 1   | 2   |    |    | 31            | 0                               | 20       | 11       | 0.55       | -0.8624965 | 0.09022556 | 0.0625      | 0.07894737 | 0.01538462 | 0.01242236               | 0           | 0.18159529 | 0.07788462 | 0.43       | -1.22 |       |
| Disks large-associated protein 1 OS=Mus musculus GN=Dlgap1 PE=1 SV=3 [DGLP1_MOUSE]                                  | Dlgap1       | 11  | 12  | 18 | 3   | 2   |    |    | 48            | 0                               | 31       | 17       | 0.55       | -0.8664735 | 0.08270677 | 0.075       | 0.23684211 | 0.04615385 | 0.01242236               | 0.00481633  | 0.3197123  | 0.16197017 | 0.49       | -1.04 |       |
| Uncoupled myosin-Va OS=Mus musculus GN=Myo5a PE=1 SV=1 [D3YZ62_MOUSE]                                               | Myo5a        | 13  | 10  | 0  | 0   | 10  |    |    | 34            | 5.6                             | 23       | 11       | 0.48       | -1.0641303 | 0.09774436 | 0.0625      | 0          | 0.0621118  | 0.02040816               | 0.15885616  | 0.08290816 | 0.52       | -0.95      |       |       |
| Brain-enriched guanylate kinase-associated protein OS=Mus musculus GN=Begain PE=1 SV=1                              | Begain       | 4   | 2   | 5  | 3   |     |    |    | 14            | 0                               | 9        | 5        | 0.56       | -0.8479969 | 0.03007519 | 0.0125      | 0.06278947 | 0.04615385 | 0                        | 0.09586466  | 0.05865385 | 0.61       | -0.71      |       |       |
| Leucine-rich repeat-containing protein 7 OS=Mus musculus GN=Linc7 PE=1 SV=1                                         | Linc7        | 11  | 10  | 3  | 3   | 19  |    |    | 48            | 2                               | 33       | 15       | 0.45       | -1.1375026 | 0.08270677 | 0.0625      | 0.03947368 | 0.04615385 | 0.11801242               | 0.00481633  | 0.24019287 | 0.14947017 | 0.62       | -0.68 |       |
| SH3 and multiple ankyrin repeat domains protein 2 OS=Mus musculus GN=Shank2 PE=1 SV=2 [SHAN2_MOUSE]                 | Shank2       | 82  | 99  | 60 | 37  | 124 |    |    | 423           | 0                               | 266      | 157      | 0.59       | -0.7606617 | 0.61654135 | 0.61875     | 0.78947368 | 0.56923077 | 0.77018634               | 0.42857413  | 2.17621037 | 1.6165522  | 0.74       | -0.43 |       |
| IQ motif and SEC7 domain-containing protein 2 OS=Mus musculus GN=Iqsec2 PE=1 SV=3                                   | Iqsec2       | 118 | 116 | 68 | 53  | 149 |    |    | 534           | 1                               | 335      | 199      | 0.59       | -0.7513927 | 0.88721805 | 0.725       | 0.89473684 | 0.81538462 | 0.6122449                | 2.70742073  | 2.15262951 | 0.80       | -0.33      |       |       |
| Actin, cytoplasmic 2 OS=Mus musculus GN=Actg1 PE=1 SV=1 [ACTG1_MOUSE]                                               | Actg1        | 14  | 6   | 1  | 2   | 7   |    |    | 33            | 36.3                            | 22       | 11       | 0.50       | -1         | 0.052632   | 0.0375      | 0.0121579  | 0.0307692  | 0.0434783                | 0.0612245   | 0.1618999  | 0.1234937  | 0.80       | -0.32 |       |
| Glutamate receptor ionotropic, NMDA 2A OS=Mus musculus GN=Grin2a PE=1 SV=2                                          | Grin2a       | 35  | 54  | 23 | 13  | 49  |    |    | 88            | 182                             | 0        | 107      | 75         | 0.70       | -0.5124683 | 0.26315789  | 0.3375     | 0.30063158 | 0.2                      | 0.30434783  | 0.16326531 | 0.8701373  | 0.70076551 | 0.81  | -0.31 |
| IQ motif and SEC7 domain-containing protein 1 OS=Mus musculus GN=Iqsec1 PE=1 SV=1                                   | Iqsec1       | 22  | 21  | 9  | 9   | 19  |    |    | 33            | 1                               | 50       | 33       | 0.66       | -0.5994621 | 0.16541353 | 0.13125     | 0.11842105 | 0.13846154 | 0.11801242               | 0.0612449   | 0.40184703 | 0.30093603 | 0.82       | -0.28 |       |
| Glutamate receptor ionotropic, NMDA 1 OS=Mus musculus GN=Grin1 PE=1 SV=1                                            | Grin1        | 8   | 22  | 27 | 7   | 2   |    |    | 72            | 0                               | 37       | 35       | 0.95       | -0.0801703 | 0.06015038 | 0.1375      | 0.35526316 | 0.10769231 | 0.01242236               | 0.12244898  | 0.42783589 | 0.36764129 | 0.86       | -0.22 |       |
| Brain-specific angiogenesis inhibitor 1-associated protein 2 OS=Mus musculus GN=Balap2 PE=1 SV=1                    | Balap2       | 45  | 25  | 26 | 31  | 19  |    |    | 151           | 1.3                             | 90       | 61       | 0.68       | -0.5611158 | 0.33834586 | 0.15625     | 0.34210526 | 0.47692308 | 0.11801242               | 0.02024021  | 0.79846355 | 0.73513389 | 0.92       | -0.12 |       |
| Protein Rasal2 OS=Mus musculus GN=Rasal2 PE=1 SV=1                                                                  | Rasal2       | 7   | 5   | 6  | 4   | 2   |    |    | 24            | 1.3                             | 16       | 8        | 0.50       | -1         | 0.05263158 | 0.066578947 | 0.09230769 | 0.02484472 | 0.04081633               | 0.143212402 | 0.13312402 | 0.93       | -0.11      |       |       |
| Glutamate receptor ionotropic, NMDA 2B OS=Mus musculus GN=Grin2b PE=1 SV=1                                          | Grin2b       | 133 | 160 | 76 | 65  | 161 |    |    | 644           | 1                               | 370      | 274      | 0.74       | -0.4333494 | 1          | 1           | 1          | 1          | 1                        | 1           | 3          | 3          | 1.00       | 0.00  |       |
| Myelin basic protein (Fragment) OS=Mus musculus GN=Mbp PE=1 SV=1 [F6RWV8_MOUSE]                                     | Mbp          | 13  | 7   | 3  | 6   | 2   |    |    | 32            | 0                               | 18       | 14       | 0.78       | -0.3625701 | 0.09774436 | 0.04375     | 0.03947368 | 0.09230769 | 0.01242236               | 0.02040816  | 0.14964051 | 0.15646586 | 1.05       | 0.06  |       |
| SH3 and multiple ankyrin repeat domains protein 1 OS=Mus musculus GN=Shank1 PE=1 SV=1 [D3Y2U4_MOUSE]                | Shank1       | 79  | 36  | 48 | 61  | 43  |    |    | 298           | 0                               | 170      | 119      | 0.70       | -0.5145732 | 0.59389496 | 0.225       | 0.61517895 | 0.93846154 | 0.26700075               | 0.44897959  | 1.49284465 | 1.61244113 | 1.08       | 0.11  |       |
| SH3 and multiple ankyrin repeat domains protein 3 OS=Mus musculus GN=Shank3 PE=1 SV=1 [A0A0A0M0Q5_MOUSE]            | Shank3       | 77  | 62  | 39 | 55  | 67  |    |    | 320           | NA                              | 183      | 137      | 0.75       | -0.4176678 | 0.57894737 | 0.3875      | 0.51315789 | 0.84615385 | 0.41614907               | 0.0816327   | 1.50825433 | 1.64181711 | 1.09       | 0.12  |       |
| Calcium/calmodulin-dependent protein kinase type II subunit delta OS=Mus musculus GN=Camk2d PE=1 SV=1               | Camk2d       | 21  | 23  | 25 | 18  | 13  |    |    | 115           | 2.9                             | 59       | 56       | 0.95       | -0.0752881 | 0.15789474 | 0.14375     | 0.32894737 | 0.27692308 | 0.08074534               | 0.06122449  | 0.56758745 | 0.72679553 | 1.28       | 0.36  |       |
| HNRN OS=Homo sapiens GN=HNRN PE=1 SV=2                                                                              | HNRN         | 9   | 2   | 0  | 3   | 4   |    |    | 21            | 9.5                             | 13       | 8        | 0.62       | -0.7004397 | 0.06769917 | 0.0125      | 0.04615385 | 0.02484472 | 0.06122449               | 0.0251389   | 0.11587834 | 0.11587834 | 1.30       | 0.37  |       |
| Ras/Rap GTPase-activating protein SynGAP OS=Mus musculus GN=Syngap1 PE=1 SV=2 [SVGP1_MOUSE]                         | Syngap       | 88  | 59  | 55 | 72  | 50  |    |    | 360           | 0                               | 193      | 167      | 0.87       | -0.7369656 | 0.07594    | 0.36875     | 0.72368421 | 1.10769231 | 0.31055901               | 0.73469388  | 1.95589735 | 2.21112619 | 1.30       | 0.38  |       |
| Tubulin alpha chain (Fragment) OS=Mus musculus GN=Tuba4a PE=1 SV=1                                                  | Tuba4a       | 5   |     |    |     |     |    |    | 8             | 28.6                            | 5        | 3        | 0.60       | -0.7369656 | 0.07594    | 0           | 0.0307692  | 0          | 0.0307692                | 0.027594    | 0.0511774  | 0.0511774  | 1.36       | 0.45  |       |
| Homein protein homolog 1 OS=Mus musculus GN=Homein1 PE=1 SV=2                                                       | Homein1      | 26  | 17  | 20 | 26  | 13  |    |    | 114           | 1.5                             | 59       | 55       | 0.93       | -0.1012833 | 0.19548872 | 0.10625     | 0.26315789 | 0.4        | 0.08074534               | 0.24489796  | 0.5393196  | 0.75114796 | 1.39       | 0.48  |       |
| Tubulin alpha 1A chain OS=Mus musculus GN=Tuba1a PE=1 SV=1 [TBA1A_MOUSE]                                            | Tuba1a       | 7   | 4   | 4  | 4   | 22  |    |    | 34            | 0                               | 22       | 11       | 1.00       | 0          | 0.0526316  | 0.0615385   | 0          | 0.0612245  | 0.1052632                | 0.147763    | 0.147763   | 1.40       | 0.49       |       |       |
| Actin, cytoplasmic 1 (Fragment) OS=Mus musculus GN=Actb PE=1 SV=1                                                   | Actb         | 10  | 7   | 2  | 4   | 5   |    |    | 32            | 15                              | 8        | 27       | 0.58       | -0.1805722 | 0.075188   | 0.04375     | 0.0261558  | 0.0615385  | 0.0310559                | 0.1325597   | 0.1325597  | 1.4820211  | 1.41       | 0.50  |       |
| Disks large homolog 4 OS=Mus musculus GN=Dlg4 PE=1 SV=1 [DLG4_MOUSE]                                                | Dlg4         | 98  | 60  | 68 | 102 | 42  |    |    | 414           | 1                               | 208      | 206      | 0.99       | -0.0139392 | 0.73684211 | 0.375       | 0.89473684 | 1.56923077 | 0.26086957               | 0.89759918  | 1.89244851 | 2.84218995 | 1.50       | 0.59  |       |
| Disks large homolog 2 OS=Mus musculus GN=Dlg2 PE=1 SV=2                                                             | Dlg2         | 35  | 18  | 25 | 42  | 15  |    |    | 153           | 1.4                             | 75       | 78       | 1.04       | 0.05668353 | 0.26315789 | 0.1125      | 0.2894737  | 0.64615385 | 0.09315789               | 0.6827297   | 0.36734094 | 0.6827297  | 1.12620078 | 1.64  | 0.72  |
| Calcium/calmodulin-dependent protein kinase type II subunit gamma OS=Mus musculus GN=Camk2g PE=1 SV=1 [KCC2G_MOUSE] | Camk2g       | 16  | 19  | 13 | 15  | 12  |    |    | 88            | 1.5                             | 41       | 47       | 1.15       | 0.19703685 | 0.12010075 | 0.11875     | 0.17109293 | 0.23076923 | 0.0745416                | 0.29531821  | 0.36088754 | 0.61462535 | 1.68       | 0.76  |       |
| Calcium/calmodulin-dependent protein kinase type II subunit alpha OS=Mus musculus GN=Camk2a PE=1 SV=2 [KCC2A_MOUSE] | Camk2a       | 49  | 54  | 38 | 48  | 43  |    |    | 213           | 2.4                             | 130      | 143      | 1.10       | 0.13750352 | 0.36842105 | 0.3375      | 0.5        | 0.73846154 | 0.26700075               | 0.83673469  | 1.1355018  | 1.9126623  | 1.88       | 0.75  |       |
| Calcium/calmodulin-dependent protein kinase type II subunit beta OS=Mus musculus GN=Camk2b PE=1 SV=2                | Camk2b       | 28  | 26  | 16 | 29  | 19  |    |    | 138           | 2.7                             | 63       | 75       | 1.19       | 0.2515877  | 0.21052632 | 0.1625      | 0.21052632 | 0.44615385 | 0.11801242               | 0.40816327  | 0.33905605 | 1.01681711 | 1.89       | 0.92  |       |
| Disks large-associated protein 3 OS=Mus musculus GN=Dlgp3 PE=1 SV=1                                                 | Dlgp3        | 12  | 11  | 3  | 20  | 6   |    |    | 57            | 0                               | 21       | 36       | 1.71       | 0.77760758 | 0.09022556 | 0.06875     | 0.03947368 | 0.30769231 | 0.03762708               | 0.10204892  | 0.16696633 | 0.47848312 | 2.87       | 1.52  |       |
